# Supplementary material for: Alendronate versus Raloxifene for Postmenopausal Women: A Meta-Analysis of Seven Head-to-Head Randomized Controlled Trials
Source: Hindawi journal article supplement (doi:10.1155/2014/796510), 2014-01-01

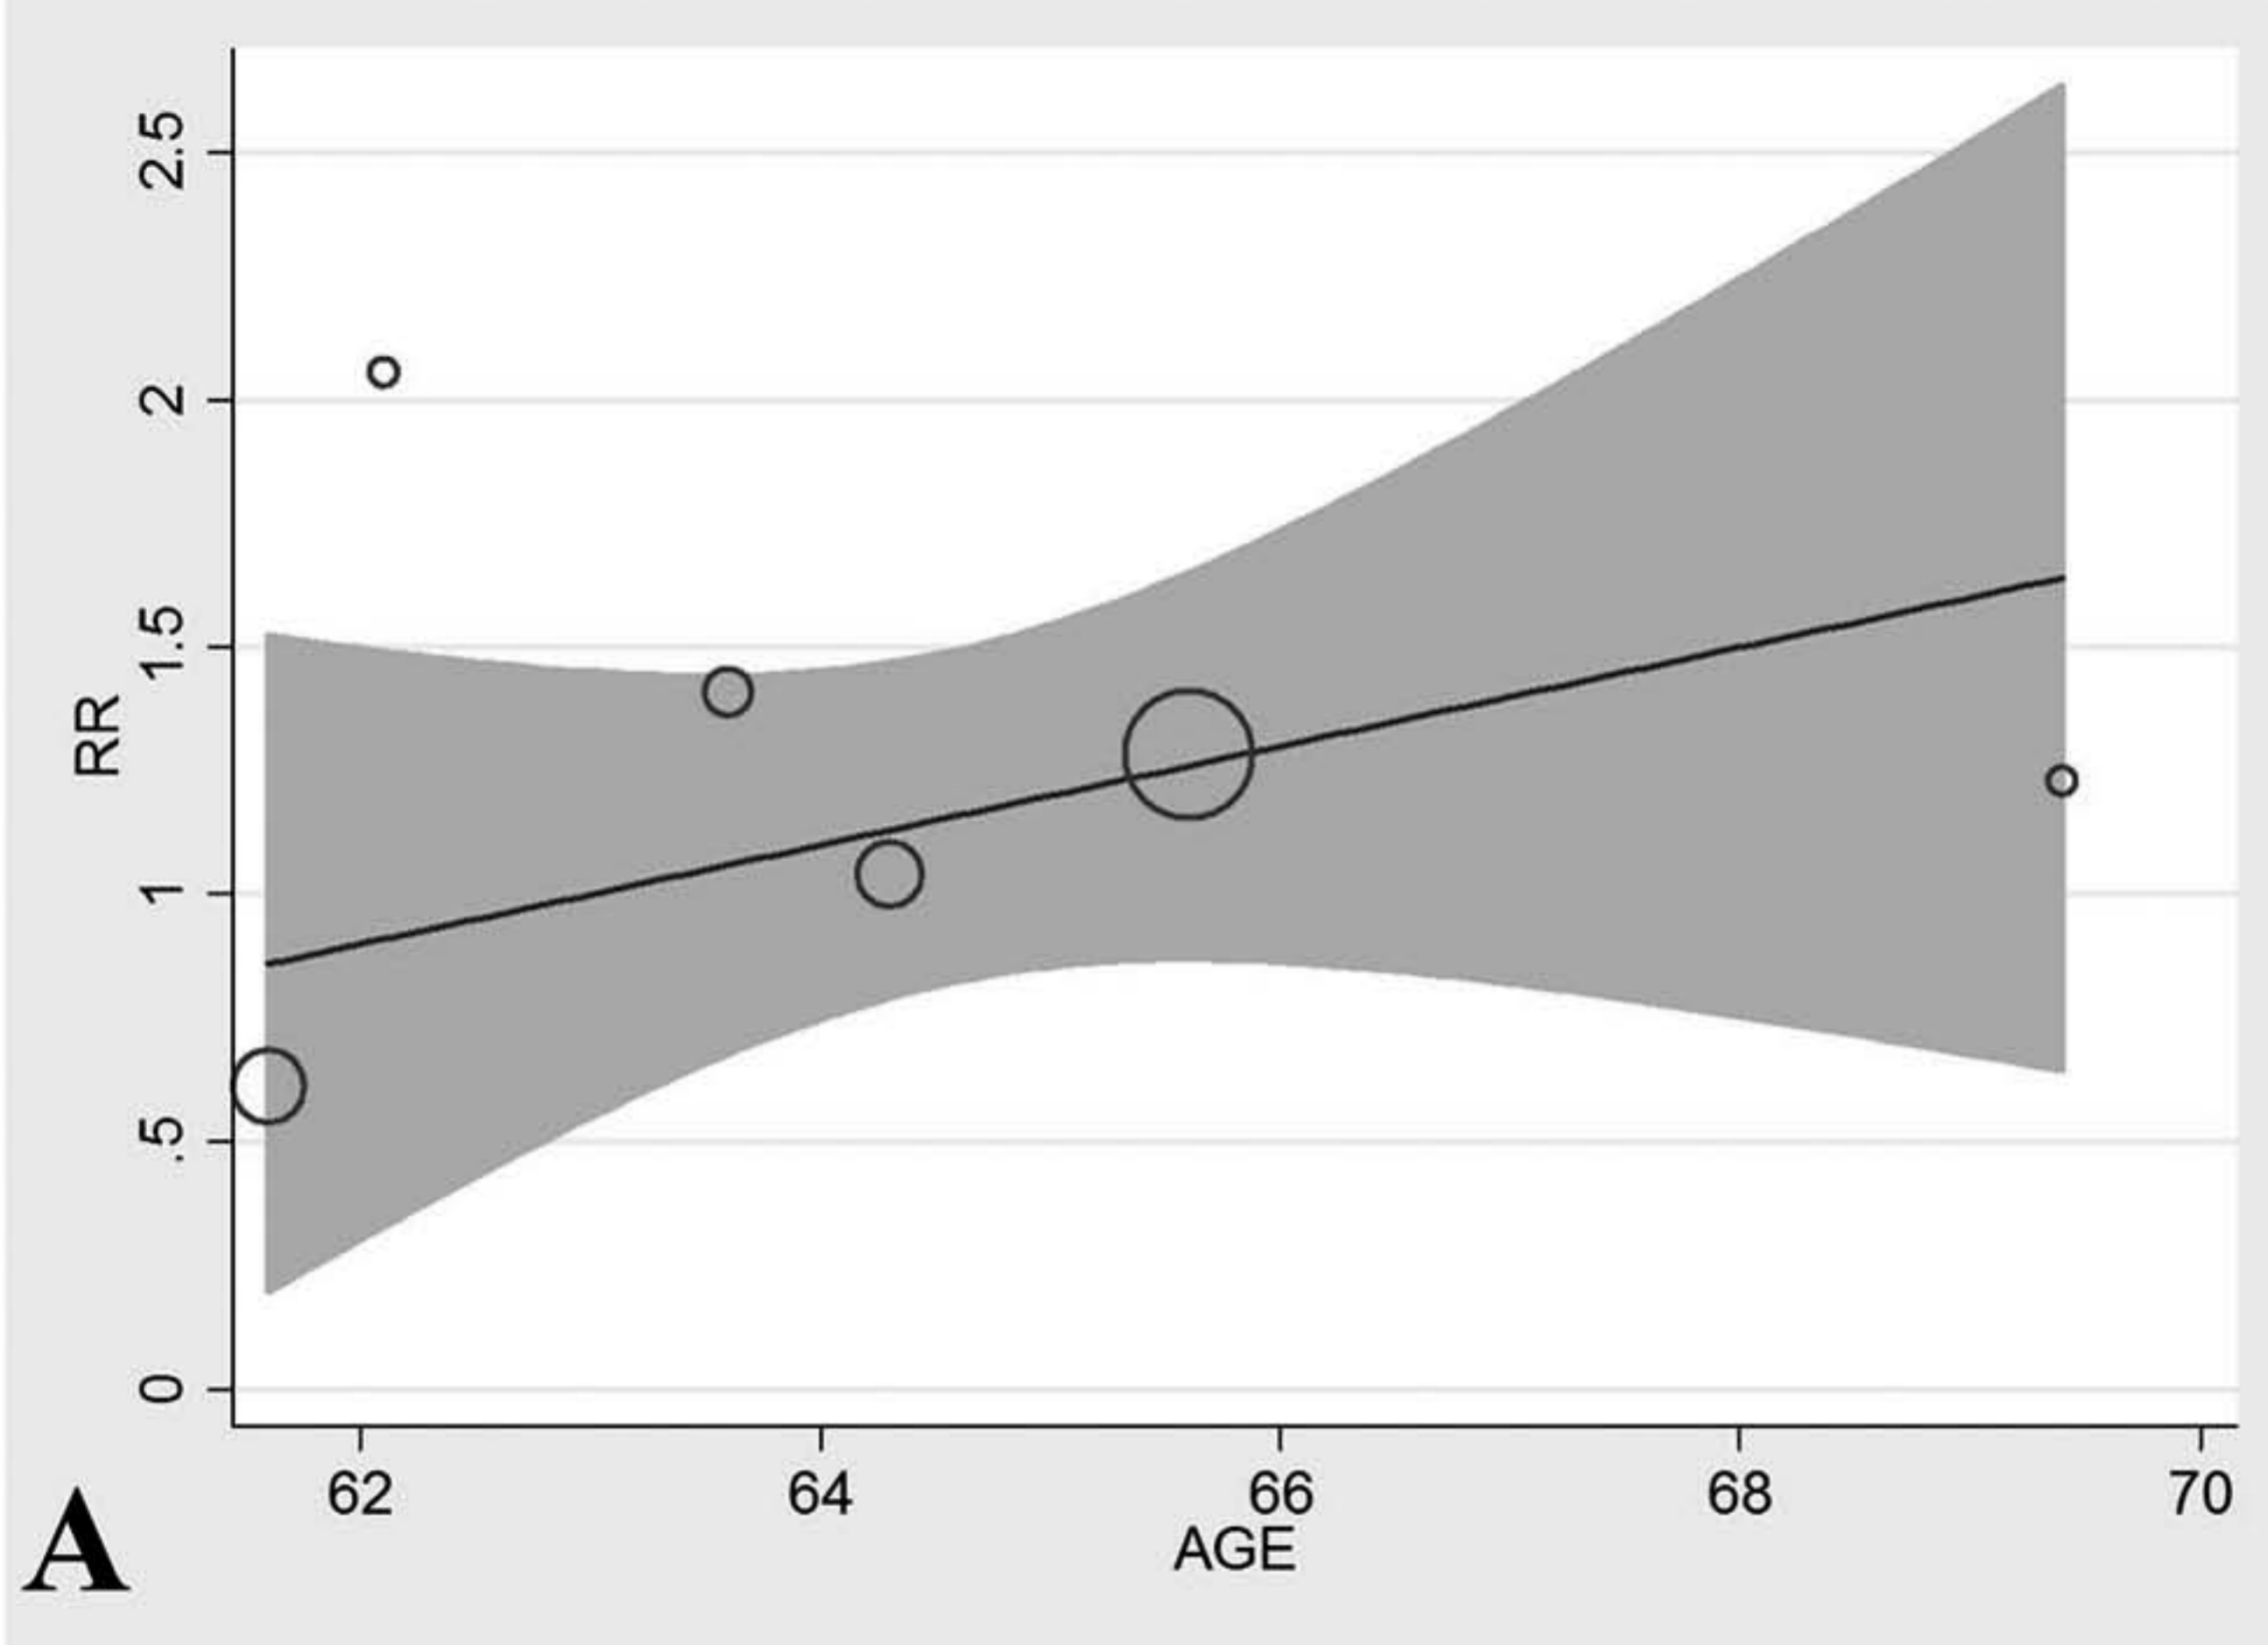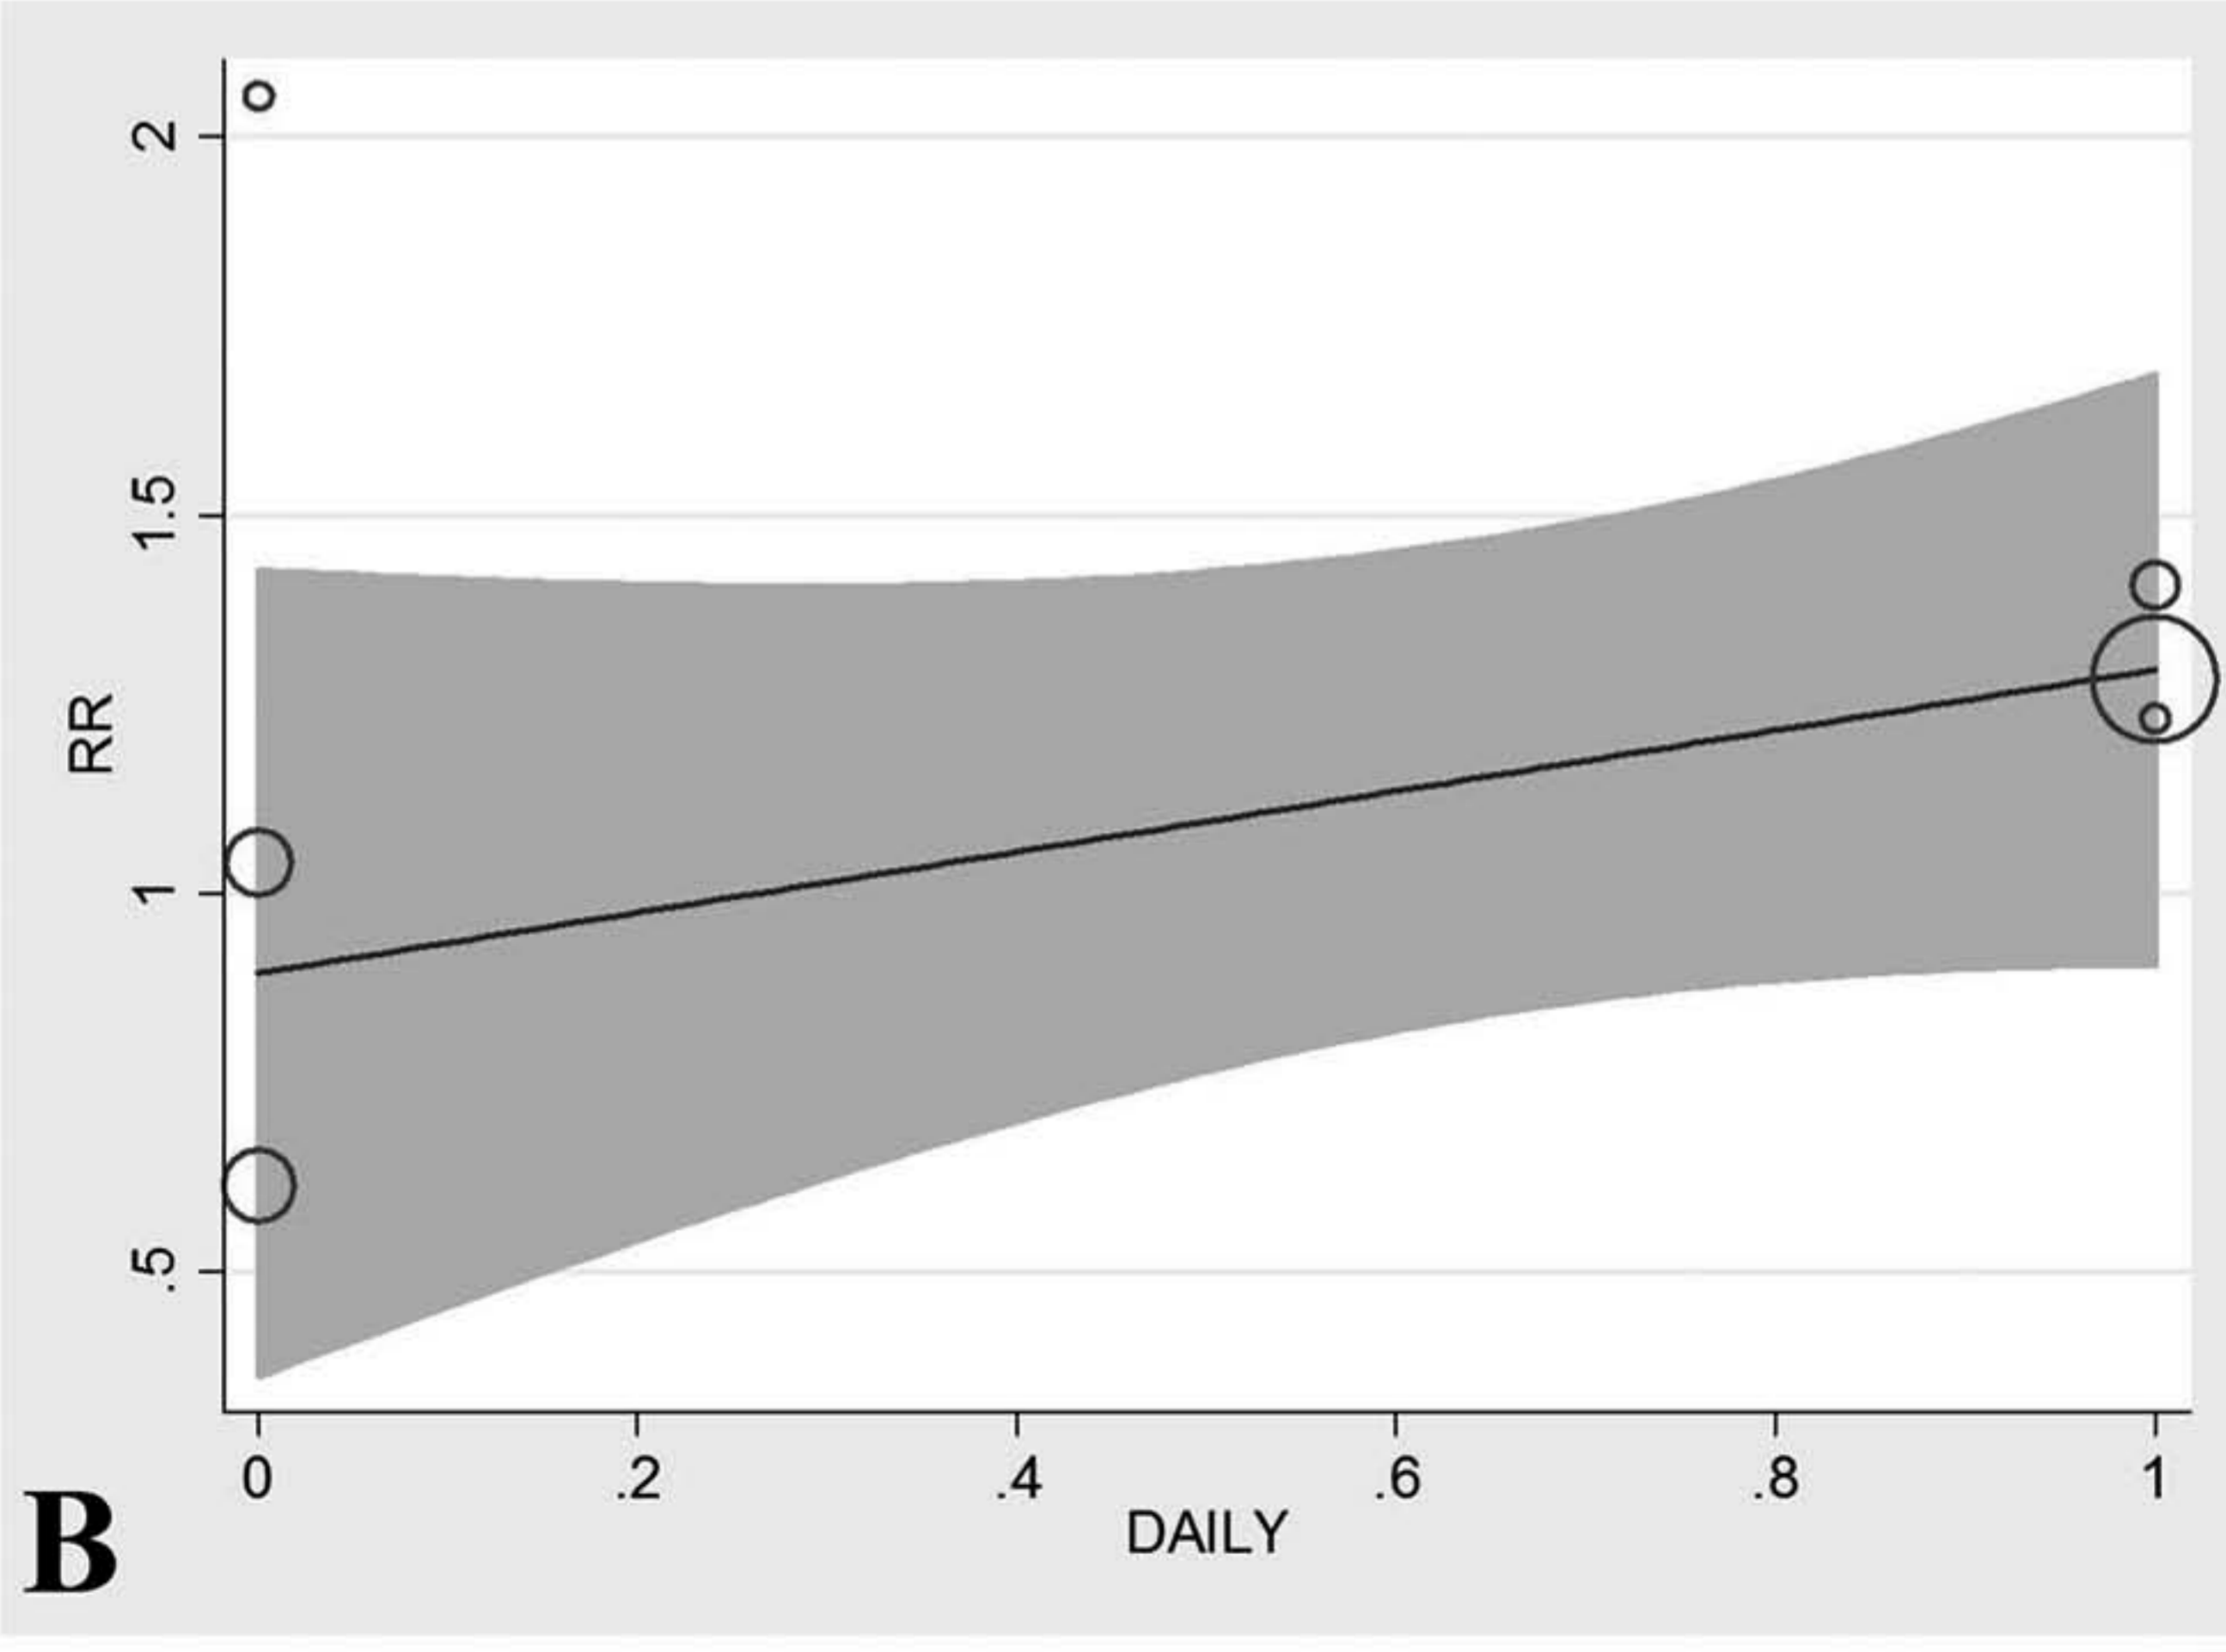

Supplementary file 1

Filled funnel plot with pseudo 95% confidence limits

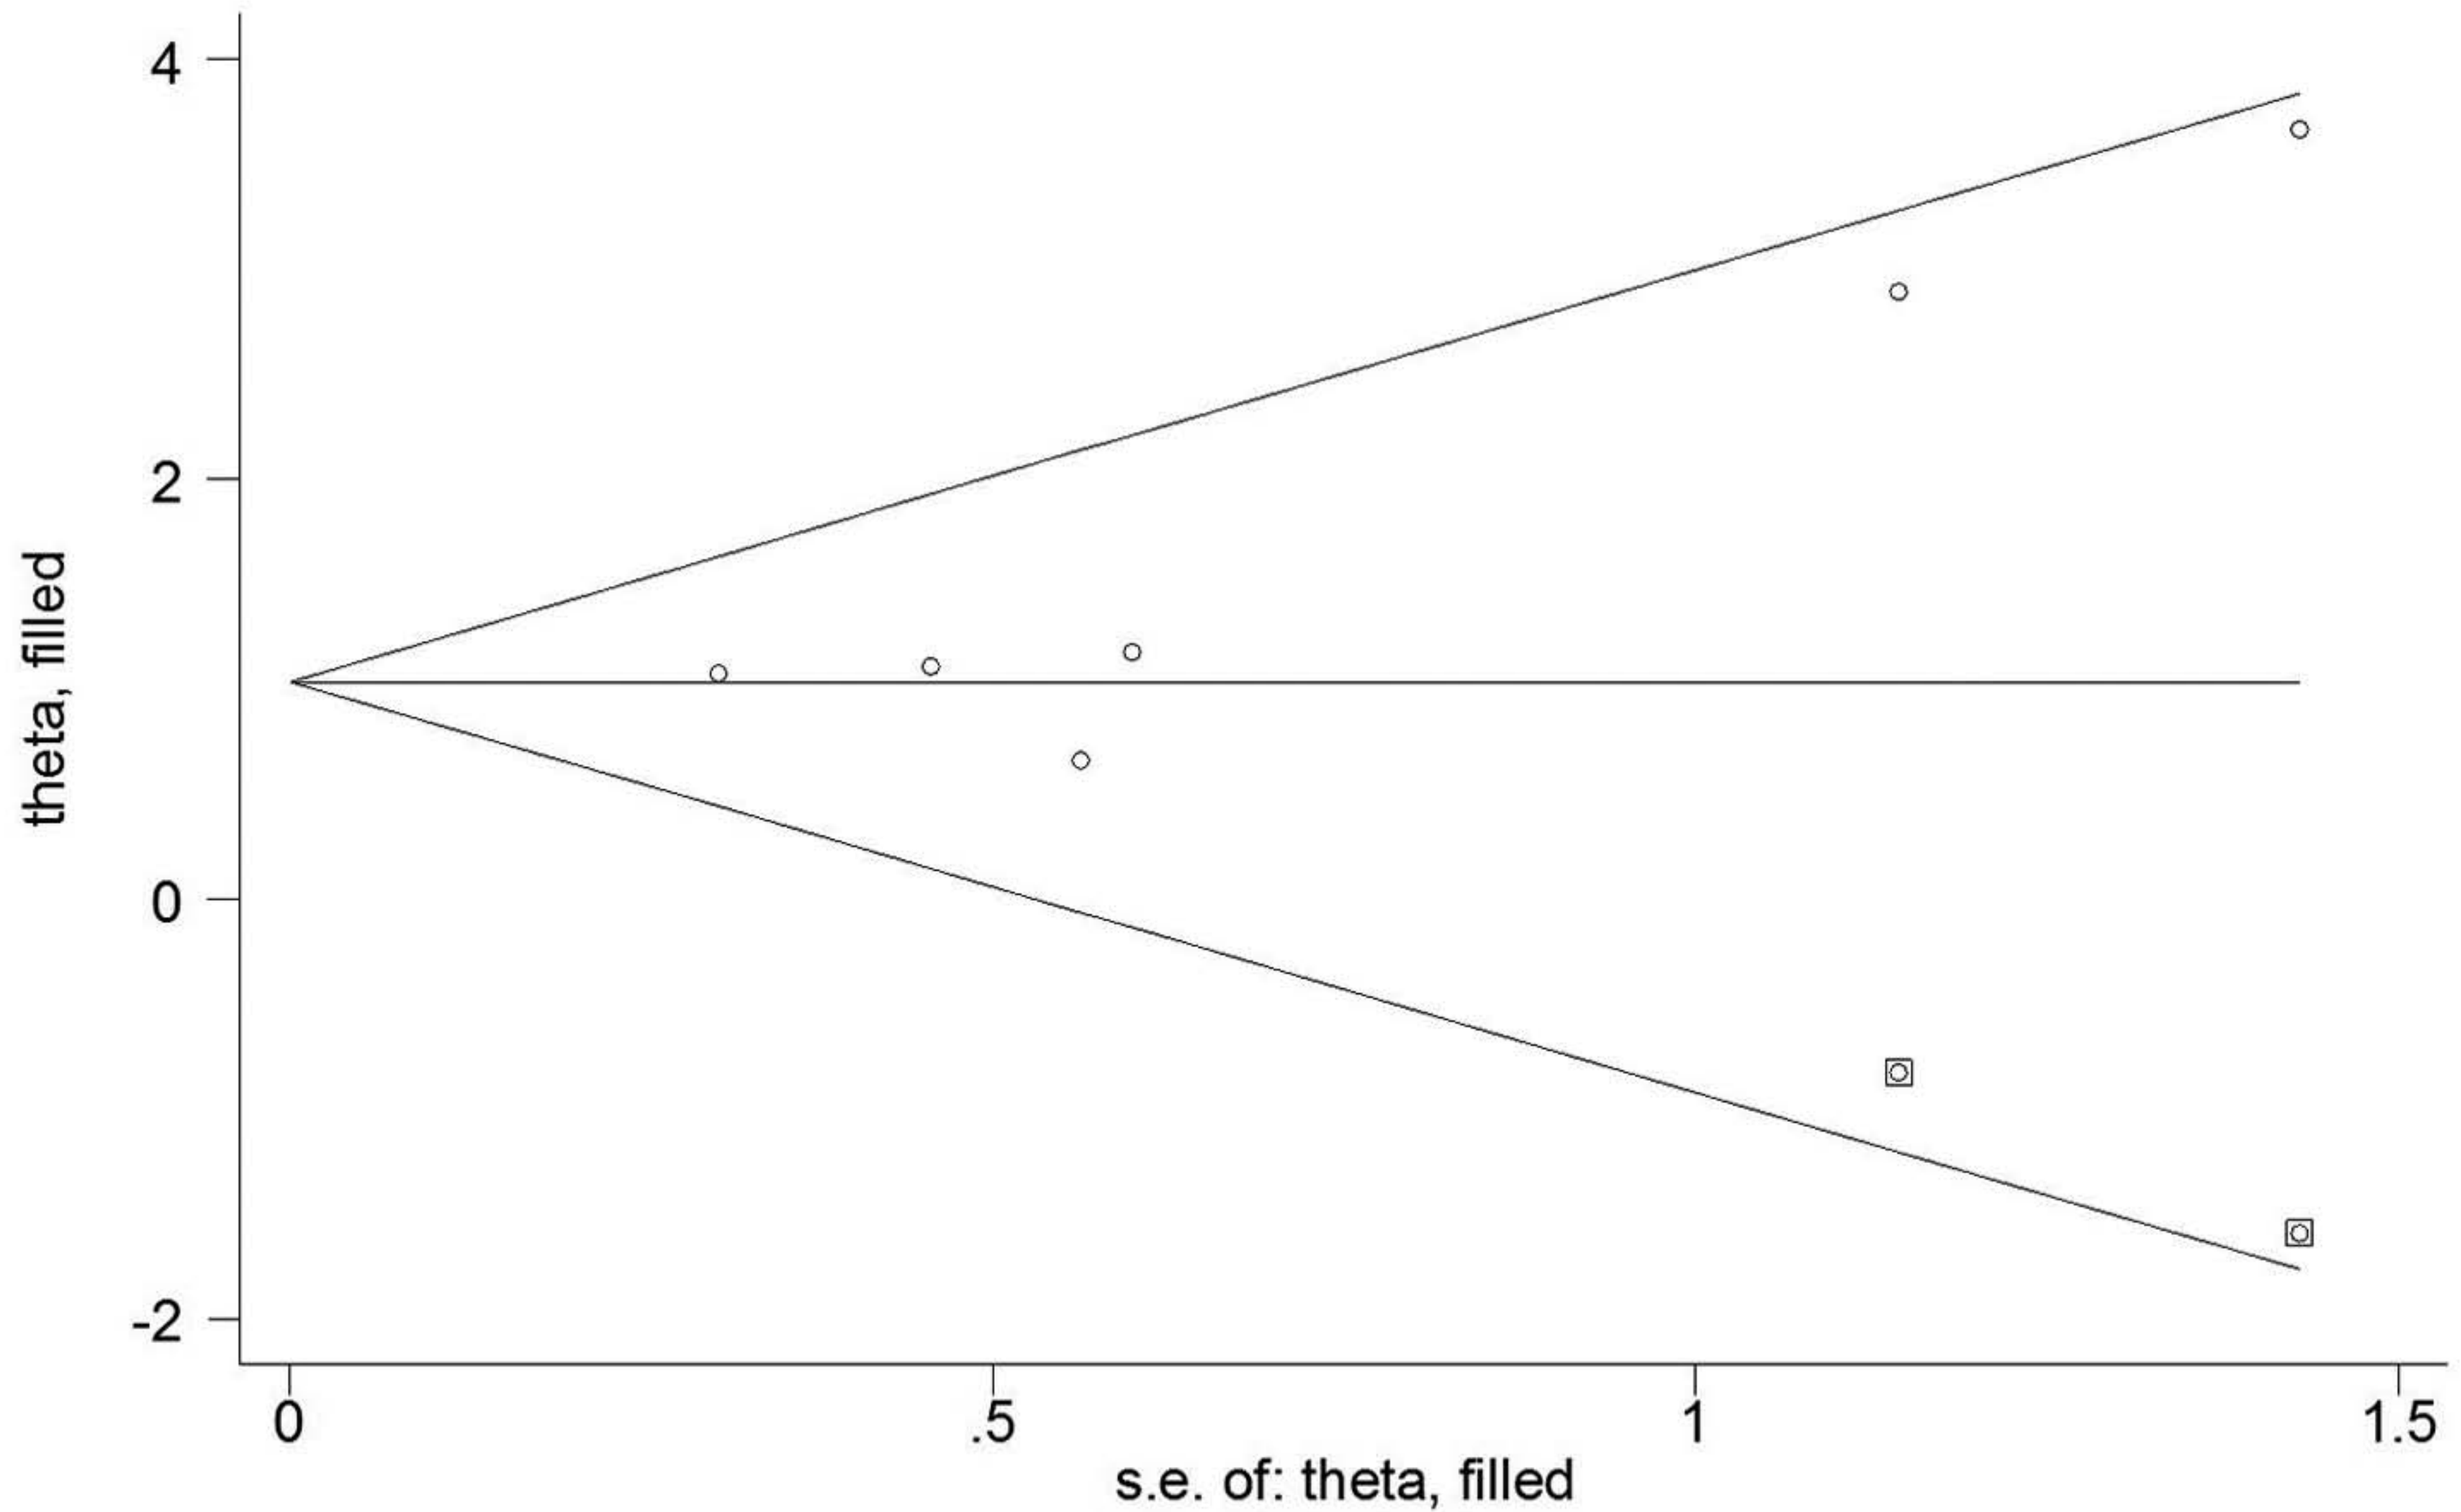

Supplement: f1 [file 796510.f1.pdf]
